# Supplementary material for: Feeding intolerance scoring system in very preterm and very low birth weight infants using clinical and ultrasound findings
Source: PubMed Central journal article supplement (PMC11079181; doi:10.3389/fped.2024.1370361), 2024-04-25
Supplement: Datasheet1.pdf [file Datasheet1.pdf]

Supplementary figure 1

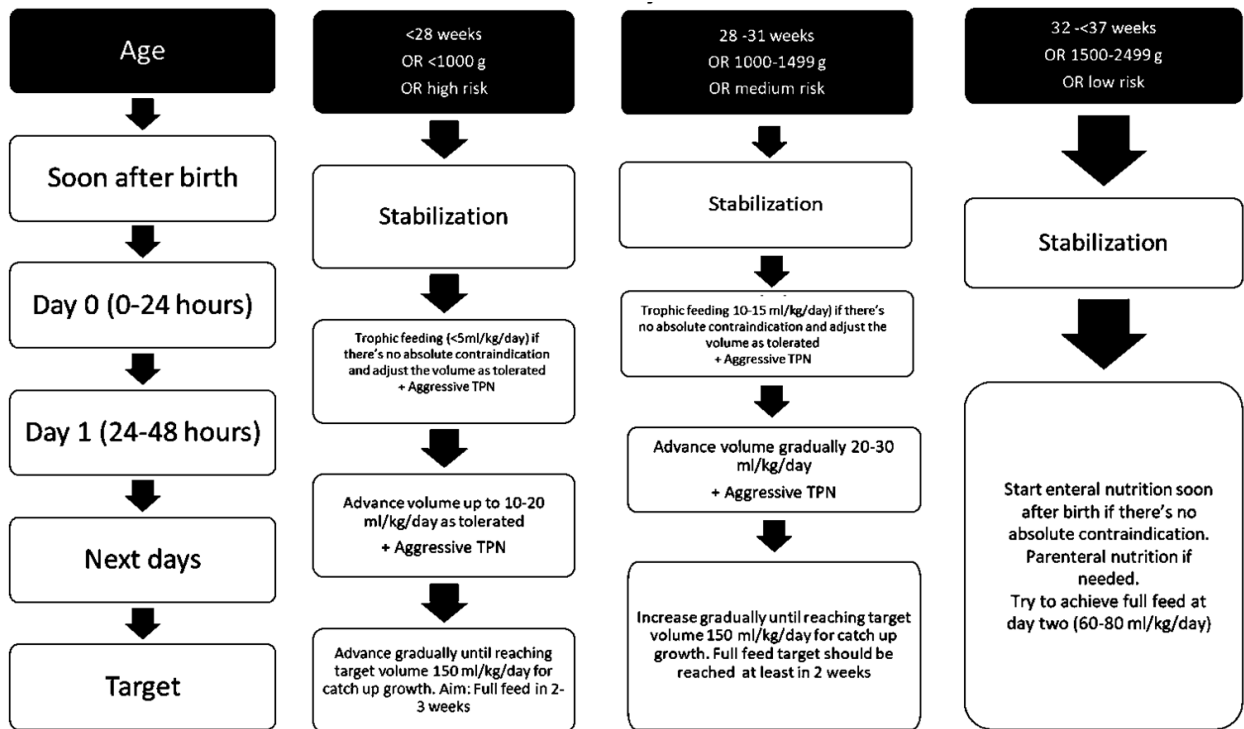

Supplementary table 1

| Parameter                    | 1 <sup>st</sup> US | 2 <sup>nd</sup> US | 3 <sup>rd</sup> US |
|------------------------------|--------------------|--------------------|--------------------|
| <b>Abdominal distension*</b> |                    |                    |                    |
| No                           | 134 (85,9%)        | 121 (82,3%)        | 107 (83,6%)        |
| Yes, not tense               | 19 (12,2%)         | 25 (17,0%)         | 20 (15,6%)         |
| Yes, tense                   | 3 (1,9%)           | 1 (0,7%)           | 1 (0,8%)           |
| <b>Vomiting</b>              |                    |                    |                    |
| No                           | 145 (92,9%)        | 136 (87,2%)        | 116 (90,6%)        |
| Yes                          | 11 (7,1%)          | 11 (7,1%)          | 12 (9,4%)          |
| <b>Gastric fluid color</b>   |                    |                    |                    |
| Clear or white (milk)        | 101 (64,7%)        | 115 (78,2%)        | 112 (87,5%)        |
| Hemorrhagic gastric fluid    | 53 (34,0%)         | 31 (21,1%)         | 12 (9,4%)          |
| Bile-stained gastric fluid   | 2 (1,3%)           | 1 (0,7%)           | 4 (3,1%)           |

\*In the analysis, we combine tense and not tense abdominal distention into a category of abdominal distention

Supplementary Table 2

| <b>2D US Parameter</b>                 | <b>1<sup>st</sup> US</b> | <b>2<sup>nd</sup> US</b> | <b>3<sup>rd</sup> US</b> |
|----------------------------------------|--------------------------|--------------------------|--------------------------|
| Gastric residual volume before feeding | 2.08 ±2.50               | 3.26 ±3.12               | 3.16 ±2.95               |
| Gastric residual volume after feeding* | 3.41 ±2.60               | 8.15 ±6.03               | 9.37 ±5.82               |
| Gastric residual fluid (%)             | 70.2 ±35.0               | 55.1 ±29.2               | 46.5 ±24.5               |
| Intestinal peristaltic frequency       | 15.6 ±9.4                | 21.7 ±9.8                | 19.2 ±14.8               |
| Received enteral feeding               | 45 (28.8%)               | 101 (68.7%)              | 103 (80.5)               |

\*Only calculated if infants had received feeding in the 1<sup>st</sup> US (n = 45), 2<sup>nd</sup> US (n = 101), and 3<sup>rd</sup> US (n = 103)

Supplementary table 3

| <b>Color Flow Doppler US Parameter</b> | <b>1<sup>st</sup> US</b> | <b>2<sup>nd</sup> US</b> | <b>3<sup>rd</sup> US</b> |
|----------------------------------------|--------------------------|--------------------------|--------------------------|
| <b>Before feeding</b>                  | n=156                    | n=147                    | n=128                    |
| PSV (mean±SD)                          | 90.0 ±36.4               | 110.2 ±37.7              | 112.5 ±30.9              |
| EDV (mean±SD)                          | 19.4 ± 13.2              | 23.1 ±8.7                | 21.4 ±7.9                |
| RI (mean±SD)                           | 0.78 ±0.10               | 0.78 ±0.07               | 0.80 ±0.07               |
| <b>After feeding</b>                   | n=45                     | n=101                    | n=103                    |
| PSV (mean±SD)                          | 110.7 ±37.6              | 137.7±50.5               | 155.9 ±50.3              |
| EDV (mean±SD)                          | 22.6 ±9.9                | 25.2 ±12.0               | 26.3 ±9.3                |
| RI (mean±SD)                           | 0.77 ±0.08               | 0.81 ±0.07               | 0.83 ±0.05               |
